# Supplementary material for: Molecular Mechanism for Stress-Induced Depression Assessed by Sequencing miRNA and mRNA in Medial Prefrontal Cortex
Source: PubMed Central journal article supplement (PMC4948880; doi:10.1371/journal.pone.0159093), 2016-07-18
Supplement: pone.0159093.s001.pdf [file pone.0159093.s001.pdf]

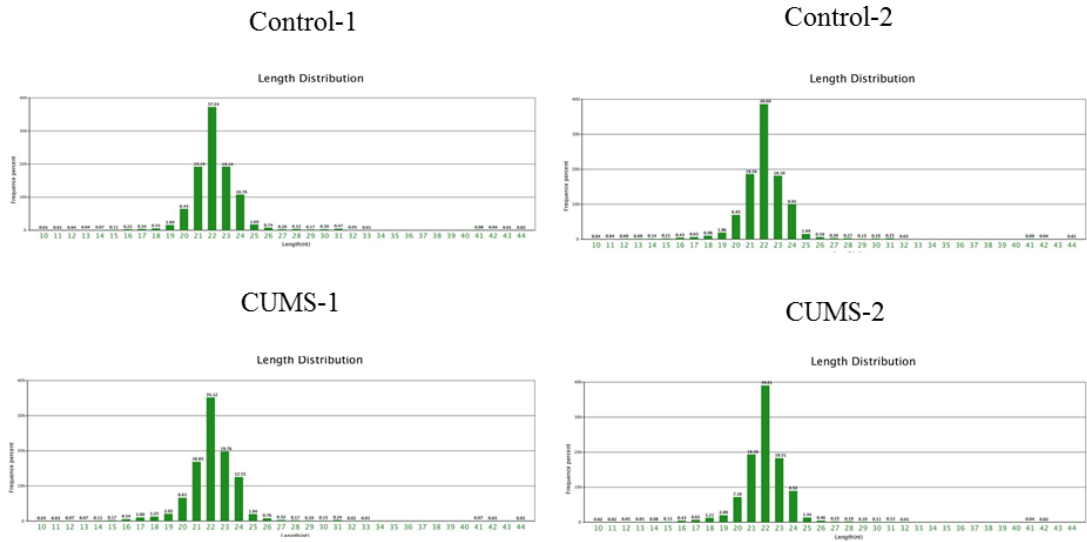

**S1 Fig. Length distribution of small RNA library for control and CUMS groups.** The distribution of nucleotide lengths of clean small RNA reads varied from 10 to 44 nucleotides in each library and the most abundant length was 22 nucleotides.
