# Supplementary material for: Molecular Mechanism for Stress-Induced Depression Assessed by Sequencing miRNA and mRNA in Medial Prefrontal Cortex
Source: PubMed Central journal article supplement (PMC4948880; doi:10.1371/journal.pone.0159093), 2016-07-18
Supplement: pone.0159093.s002.pdf [file pone.0159093.s002.pdf]

Pie chart for annotation\_Ctl-1-total

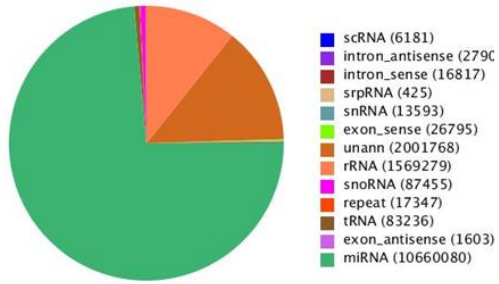

Pie chart for annotation\_Ctl-2-total

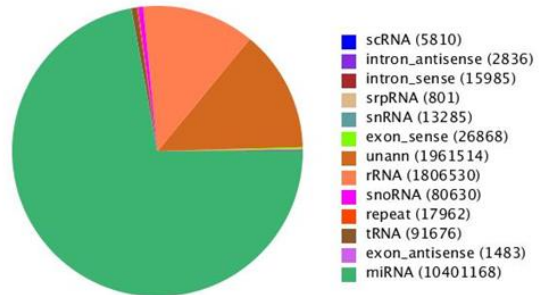

Pie chart for annotation\_CUMS-1-total

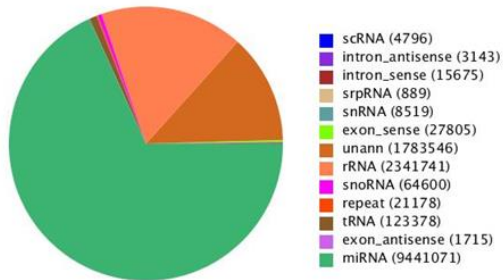

Pie chart for annotation\_CUMS-2-total

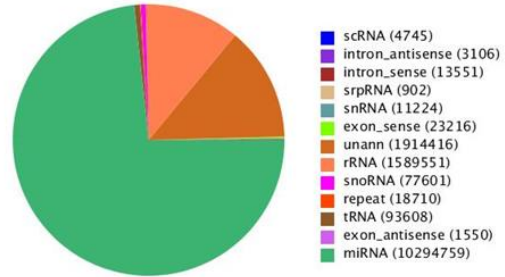

**S2 Fig. Small RNA categories annotation for control and CUMS groups.** All of the high-quality clean reads larger than 18 nucleotides were mapped to the mouse genome and these genome-matched reads were divided into different categories of small RNAs according to their biogenesis and annotation. The most abundant RNA category from each library was miRNA.
