# Supplementary material for: Molecular Mechanism for Stress-Induced Depression Assessed by Sequencing miRNA and mRNA in Medial Prefrontal Cortex
Source: PubMed Central journal article supplement (PMC4948880; doi:10.1371/journal.pone.0159093), 2016-07-18
Supplement: pone.0159093.s003.pdf [file pone.0159093.s003.pdf]

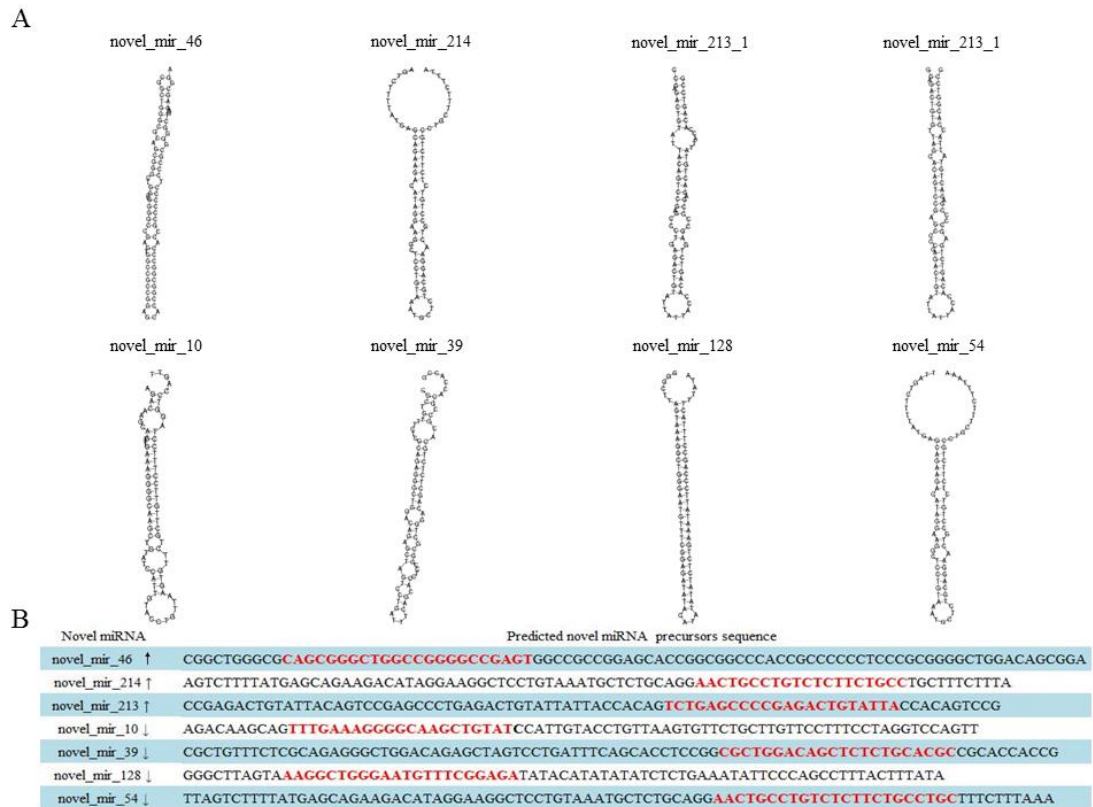

**S3 Fig. Stem loop structure and predicted mature sequence.** A: The remained reads without any annotation were used to predict potential novel miRNAs and its stem loop structure by Miredp. B: The stem loop sequence information of predict potential novel miRNAs. Red indicates the predicted novel miRNA mature nucleotide sequence.
