# Supplementary material for: Molecular Mechanism for Stress-Induced Depression Assessed by Sequencing miRNA and mRNA in Medial Prefrontal Cortex
Source: PubMed Central journal article supplement (PMC4948880; doi:10.1371/journal.pone.0159093), 2016-07-18
Supplement: pone.0159093.s005.pdf [file pone.0159093.s005.pdf]

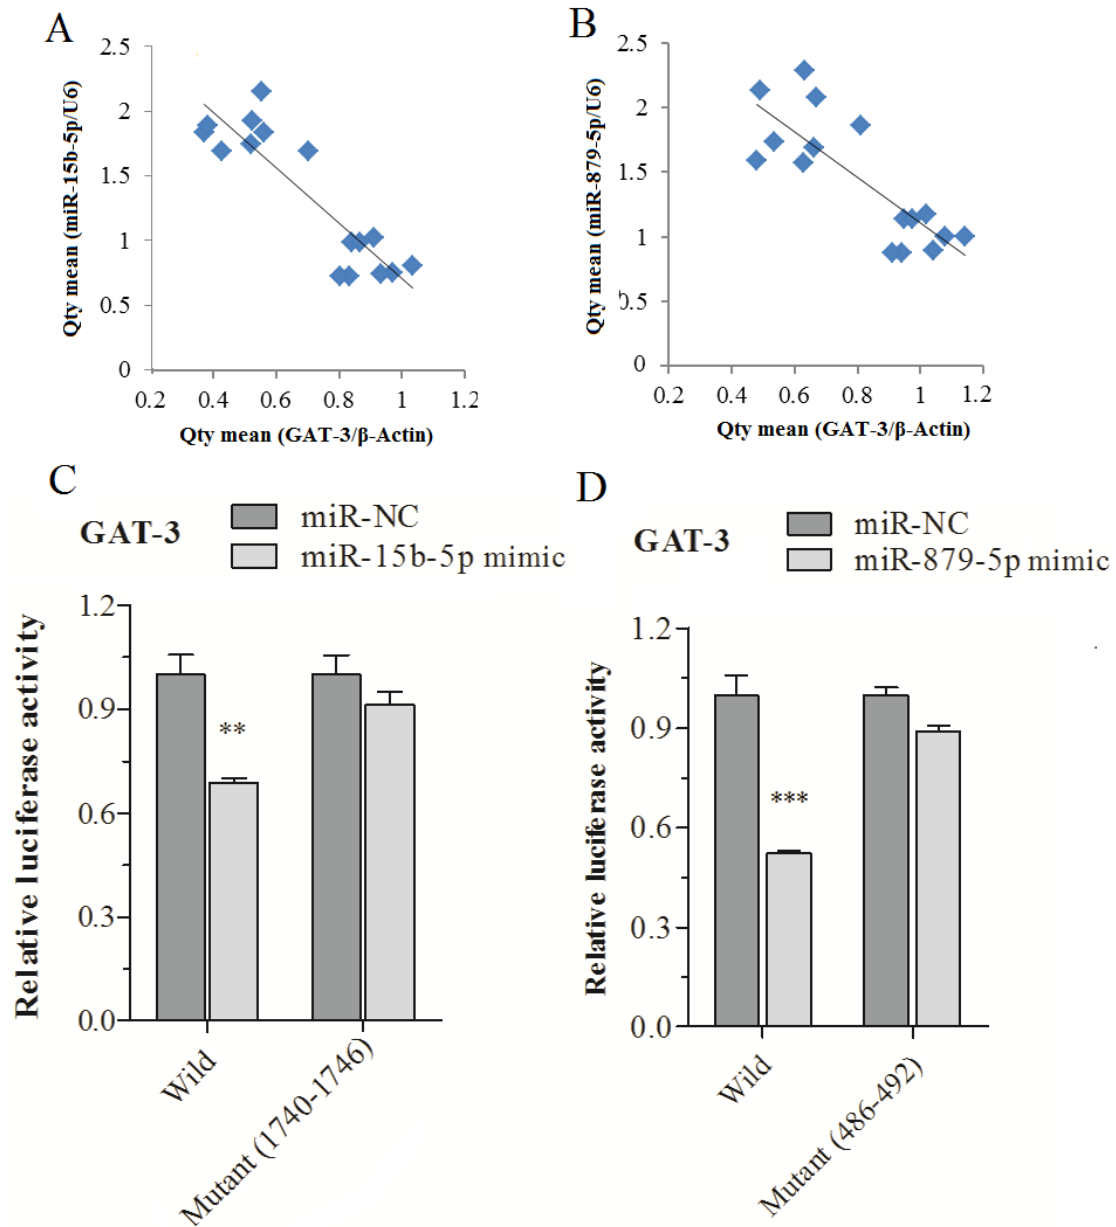

**S5 Fig. The miRNAs targeted mRNAs are validated by qRT-PCR and Luciferase reporter assay.** Correlation between miRNAs and its prediction target expression by qRT-PCR in PFC tissue. A) shows the correlation between GAT-3 and miR-15b-5p ( $r = -0.882$ ;  $p < 0.001$ ). B) shows the correlation between GAT-3 and miR-879-5p ( $r = -0.813$ ;  $p < 0.001$ ). C-D) Luciferase reporter assay is performed by the co-transfection of luciferase reporter containing wild or mutant 3'-UTR of GAT-3 mRNA with miRNA-15b-5p and

miRNA-879-5p mimic or their negative control (NC) into HEK293T cells. Data are the mean  $\pm$  SEM. qPCR of miRNAs and mRNAs were analyzed in 8 mice per group.
